# Supplementary material for: Flexible alternating current electroluminescent ammonia gas sensor
Source: Royal Society of Chemistry journal article supplement (doi:10.1039/c7ra01318c), 2017-01-01
Supplement: c7ra01318c1.pdf [file c7ra01318c1.pdf]

## Supplementary Information for

### Flexible Alternating Current Electroluminescent Ammonia Gas Sensor

Jaruwan En-on<sup>a</sup>, Adisorn Tuantranont<sup>b</sup>, Teerakiat Kerdcharoen<sup>c</sup>  
Chatchawal Wongchoosuk<sup>a,\*</sup>

<sup>a</sup>Department of Physics, Faculty of Science, Kasetsart University, Chatuchak, Bangkok 10900  
Thailand.

<sup>b</sup>Thailand Organic and Printed Electronics Innovation Center, National Electronics and  
Computer Technology Center, Klong Luang, Pathumthani 12120, Thailand.

<sup>c</sup>Department of Physics and Center of Nanoscience and Nanotechnology, Faculty of Science,  
Mahidol University, Bangkok 10400, Thailand.

\*Corresponding author >> E-mail: [chatchawal.w@ku.ac.th](mailto:chatchawal.w@ku.ac.th)

Tel.: +662-562-5555; Fax: +662-942-8029

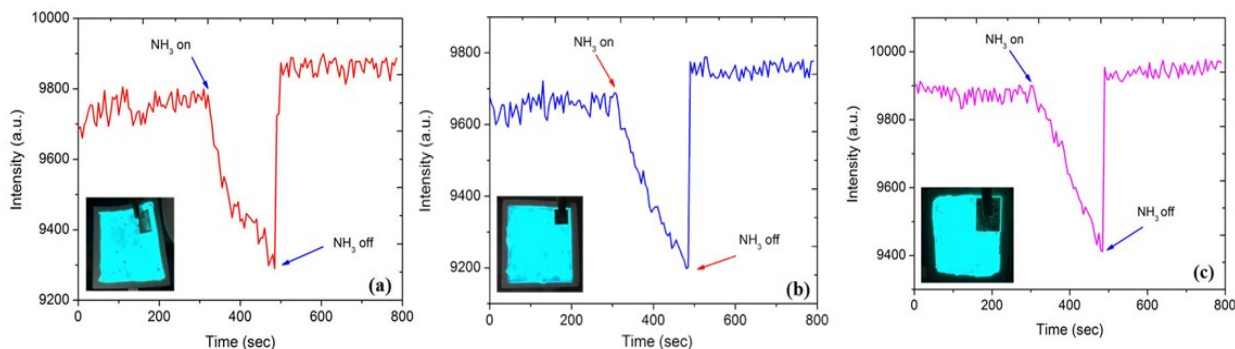

**Figure S1:** Dynamic response of EL gas sensors with different dark spots sites to 100 ppm NH<sub>3</sub> at room temperature. The calculated sensor responses of (a), (b), and (c) are 5.05%, 5.03%, and 4.94%, respective. The sensor responses of all EL gas sensors with different dark spots sites are still in the same range with SD < 0.07%.

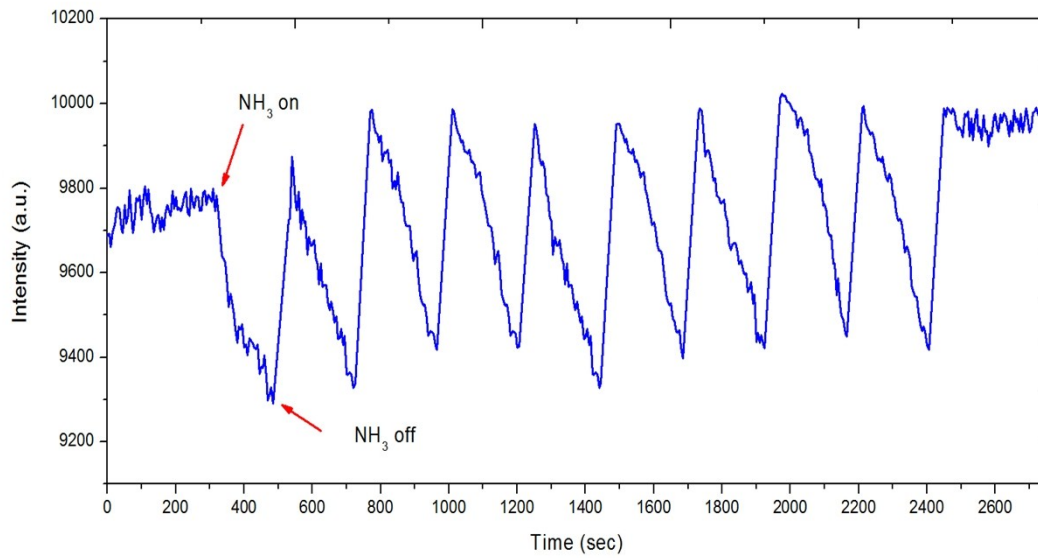

**Figure S2:** The reversible ability of EL gas sensor to 100 ppm  $\text{NH}_3$  at room temperature up to 9 cycles

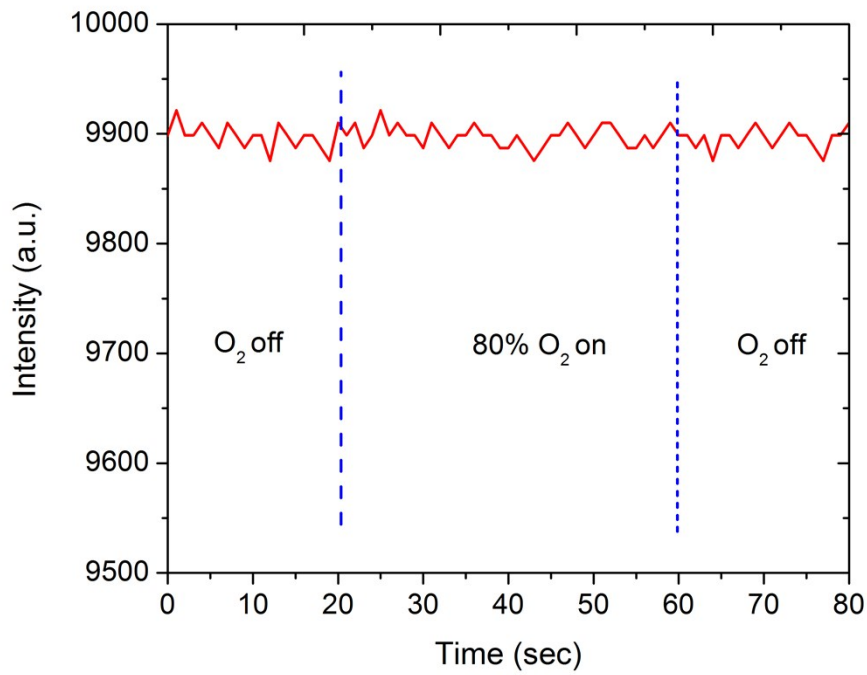

**Figure S3:** Dynamic response of EL gas sensor device to 80 vol%  $\text{O}_2$  at room temperature.

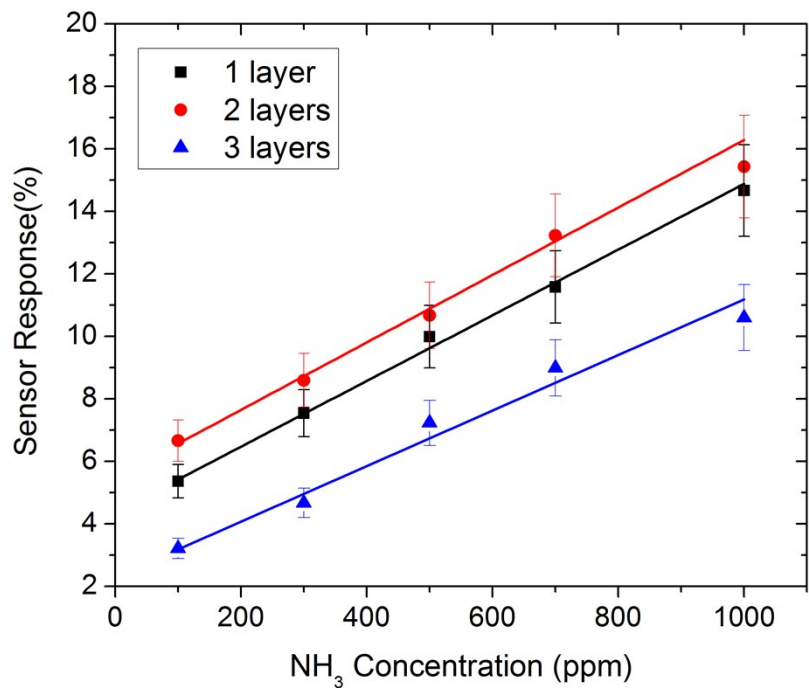

**Figure S4:** Sensor response of 1 layer, 2 layer and 3 layers PEDOT:PSS of AC-EL gas sensors as a function of NH<sub>3</sub> concentration at room temperature.

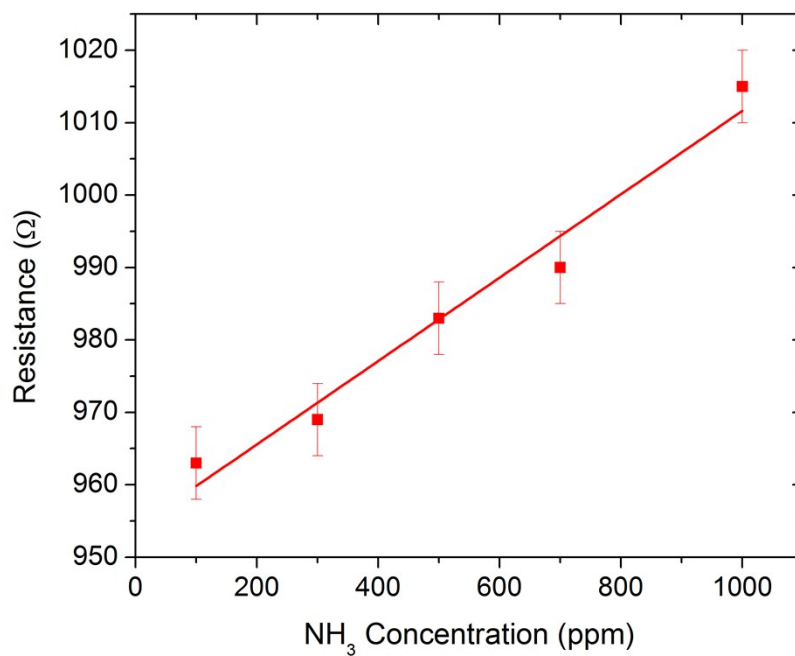

**Figure S5:** The relationship of PEDOT: PSS resistance as a function of the different NH<sub>3</sub> concentrations at room temperature.
